1 **Efficacy of SARS-CoV-2 wastewater surveillance for detection of COVID-19 at a residential**  
2 **private college**

3  
4 Michelle Landstrom<sup>1</sup>, Evan Braun<sup>1</sup>, Ellen Larson<sup>2</sup>, Merrill Miller<sup>2</sup>, and Geoffrey H. Holm<sup>1\*</sup>

5  
6 <sup>1</sup>Department of Biology, and <sup>2</sup>Student Health Services, Colgate University, 13 Oak Dr., Hamilton,  
7 NY, 13346

8 \*Corresponding Author. Email address: [gholm@colgate.edu](mailto:gholm@colgate.edu)

9  
10  
11 **Keywords:** SARS-CoV-2, COVID-19, wastewater surveillance, sewershed, residential college

12  
13 **Abstract.**

14 Many colleges and universities utilized wastewater surveillance testing for SARS-CoV-2  
15 RNA as a tool to help monitor and mitigate the COVID-19 pandemic on campuses across the  
16 United States during the 2020-2021 academic year. We sought to assess the efficacy of one  
17 such program by analyzing wastewater RNA load data in relation to SARS-CoV-2 cases identified  
18 through individual surveillance testing. Almost 80% of the cases on campus were associated  
19 with positive wastewater tests, resulting in an overall positive predictive value of ~79% (Chi  
20 square 48.1, Df = 1,  $p < 0.001$ ). However, half of the positive wastewater samples occurred in  
21 the two weeks following the return of a student to the residence hall following isolation, and  
22 therefore were not useful in predicting new infections. When these samples were excluded, the  
23 positive predictive value of a positive wastewater sample was ~54%. Overall, we conclude that  
24 the continued shedding of viral RNA by patients past the time of potential transmission  
25 confounds the identification of new cases using wastewater surveillance, and decreases its  
26 effectiveness in managing SARS-CoV-2 infections on a residential college campus.

27  
28 **Introduction.**

29 The severe acute respiratory syndrome coronavirus 2 (SARS-CoV-2) pandemic clearly  
30 poses significant challenges for many economic sectors. Prior to the introduction of vaccines,  
31 and even post-introduction, many businesses and institutions that rely on in-person meetings  
32 struggled to identify best practices that could allow for continued operation. In some instances,  
33 especially during government-mandated “lockdowns,” institutions transitioned to remote

34 operations. However, in many cases, remote operation was either not sustainable or failed to  
35 deliver satisfactory outcomes, leading these institutions to consider means for returning to in-  
36 person operation. These challenges continue to be felt acutely among institutions of higher  
37 education, particularly those with a sizeable residential component, as the high population  
38 density of dormitories, especially those with shared bathroom facilities, create conditions that  
39 can facilitate rapid transmission of respiratory pathogens.

40 As data emerged that SARS-CoV-2 can infect cells in the gastrointestinal tract (1, 2), and  
41 that SARS-CoV-2 RNA can be detected in patient stool (3, 4), including from patients prior to the  
42 onset of clinical symptoms (5), many groups began investigating whether detection of SARS-  
43 CoV-2 RNA in wastewater could be used as a means of monitoring communities for emerging  
44 infections, or of directing public health responses. Epidemiological wastewater surveillance had  
45 previously been utilized for poliovirus, norovirus, and rotavirus (6–8), and gave strong  
46 indication that similar approaches could be beneficial, either to directly assess disease burden  
47 in a population, identify areas where the SARS-CoV-2 was newly introduced, or monitor  
48 changes in transmission status over time and thereby assess the effects of community  
49 interventions (9). The utility of these approaches became even more evident as data emerged  
50 correlating levels of SARS-CoV-2 RNA in wastewater with number of cases in the sewershed  
51 (10–12), with wastewater RNA levels increasing several days prior to an increase in positive test  
52 results indicative of SARS-CoV-2 infections (13–15).

53 Based on these reports, in the lead up to the Fall 2020 academic semester, many  
54 colleges and universities in the U.S. sought to implement wastewater surveillance as a tool to  
55 manage the pandemic, either as a means to detect the presence of cases within the campus  
56 population, to monitor infection levels on campus, or to target particular residence halls for  
57 individual or pooled patient testing to directly identify infected individuals (16–21). Since  
58 essentially all of these systems were implemented *de novo*, there was a lot of variability in how  
59 they were set up and used. Some institutions monitored wastewater via campus or municipal  
60 wastewater treatment plants, whereas others implemented systems to capture samples from  
61 individual residence halls or sewer lines. Some institutions collected samples that were then  
62 processed by commercial laboratories, whereas others handled their samples in house. Among

63 the strategies communicated by various institutions, there was considerable variation in the  
64 timing and frequency of collection, and in the number of campus locations that were sampled.  
65 Given this variability, it is important to assess the efficacy of the various approaches, to identify  
66 best practices and help inform continued development and implementation of wastewater  
67 surveillance strategies as a pandemic response (19).

68 In the summer of 2020, we developed and implemented a wastewater surveillance  
69 system as one piece of a comprehensive plan to facilitate the return of students to campus  
70 residences at Colgate University. Wastewater was assayed via 24-hour composite samples  
71 taken 2-3 times weekly at each of seven campus locations (sewer lines or sewage lift stations)  
72 and the samples were tested for the presence of SARS-CoV-2 RNA by quantitative reverse-  
73 transcriptase PCR (qRT-PCR). Simultaneously, students were regularly tested for SARS-CoV-2  
74 infection by anterior nares swabs, using a commercial PCR-based testing provider. We obtained  
75 de-identified information on student positive cases, the Ct value of the positive tests, and the  
76 time of removal and return to the residence hall for isolation, and analyzed this data with  
77 respect to the detection of SARS-CoV-2 in the waste stream. In the fall and spring academic  
78 semesters, Colgate identified a total of 107 student cases of SARS-CoV-2 infection. Almost 80%  
79 of these cases were associated with positive wastewater tests, resulting in an overall positive  
80 predictive value of ~79%. However, half of the positive wastewater samples occurred in the two  
81 weeks following the return of a student to the residence hall following isolation. When these  
82 samples were excluded, the positive predictive value of a positive wastewater sample was  
83 ~54%. Overall, we conclude that the continued shedding of viral RNA by patients past the time  
84 of potential transmission confounds the identification of new cases using wastewater  
85 surveillance, and decreases its effectiveness in managing SARS-CoV-2 infections on a residential  
86 college campus.

87

## 88 **Materials and Methods.**

89 **Study site.** Colgate University is a private residential undergraduate college with around 3,000  
90 students, situated in the rural community of Hamilton, NY (population ~3,800). For the 2020-  
91 2021 academic year, students had the choice of remote or in-person instruction, and over 2,600

92 students chose to be in residence, with 2,333 students in campus residence halls in the fall  
93 semester and 2280 students in campus residence halls in the spring semester (Table 1), and the  
94 rest in off-campus (private) housing in the village of Hamilton.

95

96 **Wastewater sample collection.** Wastewater samples were collected at seven locations on the  
97 Colgate University campus (Table 1; Fig. 1) using three ISCO GLS compact composite samplers  
98 (Teledyne ISCO, Lincoln, NE). Five of the seven locations (GH, SPW, BAE, CD, BC) were in sewer  
99 access holes, while two were at lift stations (PL, TH). A 24 h composite sample (50 ml every 20  
100 min) was collected at around 10 AM each weekday, and the samplers were rotated among the  
101 collection points at that time, resulting in each collection point being sampled an average of 2.1  
102 times per week. Three of the access points (GH, BC, and TH) required external ground-level  
103 storage of the sampler; at these locations, a single draw was obtained during the times when  
104 the ambient air temperature was too low to permit composite sampling (intermittently  
105 between Jan. and Mar.). Composite samples were mixed by agitation and ~250 ml of the total  
106 volume of each sample was collected and returned to the lab, where it was stored at 4°C until  
107 processing. The interior tubing of the samplers was rinsed with 10% bleach followed by distilled  
108 water after each sample collection. Dedicated collection hoses and filters remained at each  
109 location and were rinsed with distilled water after each collection and with 10% bleach on a  
110 regular basis. Samples were also collected from the Village of Hamilton wastewater treatment  
111 plant, though these samples were excluded from this analysis since infection data from the  
112 entire population serviced by this facility (which includes Colgate University and Colgate's  
113 isolation space) was not available.

114

115 **Ultracentrifugation and RNA extraction.** RNA was extracted following the method of Wilder et  
116 al. 2021 (22). All steps prior to RNA extraction were conducted in BSL2 conditions, as approved  
117 by the Colgate University Institutional Biosafety Committee. Briefly, ~26 ml of composite  
118 sample was layered over 12 ml of sucrose cushion (50% sucrose in 20 mM Tris-HCl (pH 7.0), 100  
119 mM NaCl, and 2 mM EDTA) in a 25x89 mm ultracentrifuge tube (Beckman Coulter, Brea, CA).  
120 The samples were then centrifuged in a SW28 Ti rotor (Beckman Coulter) at 150,000 x g in a L7-

121 55 ultracentrifuge (Beckman) for 45 m at 4°C. The supernatant was decanted and the pellets  
122 were resuspended in 200 µl of PBS and transferred to a 1.7 ml microcentrifuge tube. RNA was  
123 extracted from the sample either using an AllPrep PowerViral DNA/RNA kit (Qiagen Biosciences)  
124 according to manufacturer's protocol (with the omission of the optional bead beating step), or  
125 using Trizol (1 ml; Invitrogen/ThermoFisher) according to manufacturer's protocol. Both  
126 methods yielded equivalent RNA isolation based on pilot runs using duplicate samples. RNA was  
127 eluted in 50 µl of RNase-free water and stored (when necessary prior to analysis) at -80°C.  
128 Samples (5 µl) were treated with DNase I (Invitrogen/ThermoFisher) according to the  
129 manufacturer's protocol. DNase-treated samples were then directly used for quantitative  
130 reverse transcriptase PCR (qRT-PCR).

131

132 ***Quantification of relative wastewater SARS-CoV-2 RNA levels.*** Levels of SARS-CoV-2 RNA in  
133 undiluted samples were detected by one-step multiplex TaqMan qRT-PCR, using TaqPath 1-step  
134 Multiplex Master Mix (ThermoFisher) according to manufacturer's protocol. SARS-CoV-2 RNA  
135 was detected using the 2019-nCoV CDC RUO kit (Integrated DNA Technologies; IDT), containing  
136 primers amplifying two regions in the SARS-CoV-2 nucleocapsid (N) gene (N1 and N2). A control  
137 plasmid containing the complete nucleocapsid gene from SARS-CoV-2 (IDT), as well as a  
138 synthetic SARS-CoV-2 RNA (Applied Biological Materials, Richmond, BC, Canada), were used as  
139 positive controls for isolation procedures and for qRT-PCR reactions. To normalize for  
140 differences in biological material in each sample, extracted RNA was also probed using TaqMan  
141 primers specific for human RNase P (2019-nCoV CDC RUO primers and probe kit; IDT), and for  
142 the crAssphage bacteriophage (22). Initial samples showed a high degree of correlation  
143 between RNase P Ct values and crAssphage Ct values, although crAssphage was not as reliably  
144 detected in all samples (not shown). Therefore, RNase P Ct values were used to normalize  
145 SARS-CoV-2 N gene multiplex Ct values, using the  $\Delta\Delta\text{Ct}$  method, to obtain a relative value for  
146 SARS-CoV-2 RNA for each sample, which was reported to the Colgate University Health  
147 Analytics Team.

148

149 ***Individual SARS-CoV-2 surveillance testing.*** For both academic semesters, all Colgate University  
150 students were required to submit negative results from a home PCR-based SARS-CoV-2 test  
151 taken ~7 days prior to arrival at campus. Students, along with all employees, were then tested  
152 using a PCR-based test at the time of student arrival to campus. All students then entered a  
153 mandatory 14-day quarantine period. Students were tested a second time ~7-9 days post-  
154 arrival and were not released from quarantine until the results from the second test had been  
155 returned. Following quarantine, the whole campus population (students and employees) were  
156 randomly selected for surveillance testing at a rate of 6% of each residence hall/area or campus  
157 employee population per week (fall semester), or scheduled for surveillance testing once every  
158 2 weeks (spring semester). In the fall semester, ~50-70 additional students were selected each  
159 week for targeted surveillance testing based on wastewater SARS-CoV-2 results, identified  
160 positive cases within specific residence halls, or other events indicating increased risk of  
161 transmission (bringing the total percentage of the student population tested up to ~10% per  
162 week). Targeted surveillance testing was not widely performed during the spring semester,  
163 given the increased frequency of baseline surveillance testing. Patient samples were collected  
164 from the anterior nares by Colgate University Student Health Services and volunteers, and were  
165 shipped to Aegis Biosciences (Nashville, TN) for PCR-based analysis. Ct values for positive tests  
166 were reported by Aegis to Colgate University Student Health Services. The average Ct value for  
167 two or three PCR reactions using individual primer pairs was calculated for each case and used  
168 for analysis. In both semesters, students with symptoms consistent with COVID-19 were  
169 diagnostically tested in-house using a rapid PCR-based assay (Cepheid Biosciences). In some  
170 cases, patient tests were performed at other local laboratories. Ct values were not available for  
171 these test results. Students that tested positive for SARS-CoV-2, and their close contacts, were  
172 identified upon receipt of test results (typically 48-72 h post-collection) and separately isolated  
173 or quarantined at a local facility (which was not subject to wastewater surveillance), or, if  
174 feasible, at their family home, until allowed to return to their residence hall as established by  
175 Madison County Board of Health and New York State guidelines.  
176

177 **Data analysis.** Data on positive SARS-CoV-2 test results, their Ct values (if available), and the  
178 start and return dates of isolation, devoid of patient-identifying information were obtained  
179 from Colgate University Student Health Services. Data on de-identified total residence hall  
180 occupancies were obtained from the Office of Institutional Planning and Research. Due to low  
181 case numbers in one residence (GH), data from this residence and waste stream was combined  
182 with that of BAE to eliminate potentially identifying information. Additionally, specific dates  
183 have not been included in the manuscript to also eliminate potentially identifying information.  
184 This project was ruled as exempt from the review process by the Colgate University Institutional  
185 Review Board. Data was analyzed using GraphPad Prism statistical software package as  
186 indicated. For temporal analysis, positive wastewater samples were categorized according to  
187 their temporal relationship with positive student case(s), including those that occurred: i)  
188 within seven days prior to detection of a positive case; ii) between the date of a positive patient  
189 sample and when the student was moved to the isolation facility; iii) between the date a  
190 student was moved to the isolation facility and when they returned to the residence; iv) within  
191 5 days of the student's return from isolation; v) within 6-14 days of the student's return from  
192 isolation; and vi) those that did not correspond to any identified case within those temporal  
193 parameters.

194

## 195 **Results.**

196 During the spring and summer of 2020, Colgate University engaged in a strategic  
197 planning process to determine how best to facilitate the return of students to campus for the  
198 2020-2021 academic year, given the challenges associated with the SARS-CoV-2/COVID-19  
199 pandemic. At that time, data was emerging regarding the efficacy of detecting the presence of  
200 SARS-CoV-2 RNA in wastewater efflux via quantitative reverse transcriptase PCR (qRT-PCR) as a  
201 means of population surveillance. SARS-CoV-2 RNA can be detected in the wastewater stream  
202 as early as a week prior to identification of patients with COVID-19 based on screening of  
203 symptomatic individuals (13, 14), and based on this information, we decided to implement  
204 wastewater surveillance as one part of a comprehensive plan to facilitate the return of students  
205 to campus residences for the academic year. Colleagues at other local academic institutions

206 were working on methods to quantify SARS-CoV-2 RNA in wastewater (22) and graciously  
207 assisted in developing protocols for wastewater surveillance at Colgate University.

208 The University purchased three compact composite wastewater samplers and we  
209 consulted with the Facilities Department to determine locations for sampling. We identified  
210 seven locations on campus that would allow as many student residences as possible to be  
211 sampled, while minimizing the overlap with effluent waste from academic and administrative  
212 buildings (Fig. 1). However, due to the integrated nature of some administrative spaces within  
213 residence halls, it was impossible to exclude these entirely at some of the sampling points. In  
214 total, the sampling locations captured waste from thirteen individual residence halls or  
215 residential complexes, which housed approximately 73% of Colgate students living in campus-  
216 owned residences (Table 1). The largest population sampled was a complex with 370 students,  
217 while the smallest was a residence with 73 students, with a mean of 242 residents sampled at  
218 each collection point. Due to containing potentially identifying information, data from the  
219 smallest residence (GH) was combined with that for BAE for analysis. For wastewater samples,  
220 the relative level of SARS-CoV-2 RNA was determined using the Ct value of multiplex qRT-PCR  
221 reactions targeting the SARS-CoV-2 genome, normalized to the amount of biological material in  
222 the sample, as determined by the Ct value of a qRT-PCR reaction to detect human RNase P  
223 mRNA.

224 Concurrently, Colgate University engaged in individual surveillance testing of students  
225 and employees, as outlined. During the fall semester, from the start of first year arrival in late  
226 August, 2020 until most students left campus in mid-November, PCR-based surveillance testing  
227 detected 44 cases of SARS-CoV-2 infection in the student population (Table 1; Fig. 2A). Of the  
228 fall cases, 36 of the 44 (81%) were detected during the two arrival testing periods, and many of  
229 these cases had Ct values of >35, suggesting low viral RNA levels. The mean Ct value of the  
230 positive tests in the fall was 34.54 (Fig. 3A). Thirty-one of the cases (70.5%) occurred in  
231 residences from which wastewater samples could be collected. In the spring semester, from  
232 arrival for most students starting in late January, 2021, through the end of the semester in early  
233 May, 63 cases of SARS-CoV-2 infection were detected (Table 1; Fig. 2B). Again, a large number  
234 of cases (28; 44%) were detected during the two arrival testing periods. The mean Ct value of



235 the positive tests in the spring was 26.59, which was significantly lower (higher viral RNA levels)  
236 than in the fall (Fig. 3A;  $p < 0.0001$ ). The percentage of cases that occurred in residences from  
237 which wastewater samples could be collected (48 of 63; 76.2%) was not significantly different  
238 than in the fall ( $p = 0.51$  by Chi-square analysis).

239 In the fall, SARS-CoV-2 RNA was detected in 12 wastewater samples, from 6 out of the 7  
240 collection points (Table 1; Fig. 2A). During the spring semester, 48 wastewater samples tested  
241 positive for SARS-CoV-2, from all 7 collection points (Table 1; Fig. 2B). The relative level of SARS-  
242 CoV-2 RNA detected in wastewater samples was not significantly different between the two  
243 semesters (Fig. 3B). We analyzed the data for each wastewater sample location (Fig. 4), plotting  
244 the relative wastewater SARS-CoV-2 levels (black circles; left Y-axis); as well as the Ct value of  
245 each positive patient sample (red circles; right Y-axis). We also plotted positive patient samples  
246 for which no Ct value was available (red stars), as well as the dates the positive cases were  
247 moved from the residence hall into the isolation facility (yellow squares) and the dates the  
248 cases moved back to the residence hall following isolation (green squares). From these data, we  
249 categorized each positive wastewater sample according to its temporal relationship with  
250 positive student case(s), as described.

251 Overall, 14 of the positive samples (23.3%) were collected in the seven days prior to the  
252 identification of an infected individual in a residence that contributed to the sampled waste  
253 stream, or in the time between when patient specimen was collected and the time the  
254 individual moved to quarantine (Fig. 5A). Thirty of the positive samples (50%) were collected  
255 from locations in the two weeks following the return of an individual from isolation into that  
256 waste stream. Only two positive samples were collected in the period between when an  
257 infected individual was removed to the isolation facility and when they returned to the  
258 residence, which could result from lingering biological material in the waste stream. Twelve  
259 positive samples (20%) were not linked temporally with any student cases in that waste stream.  
260 There was no significant difference in the relative wastewater SARS-CoV-2 RNA levels in  
261 samples from these categories (Fig. 5B;  $p = 0.2$  by Kruskal-Wallis test). We also analyzed the  
262 wastewater results according to the number of student cases identified in the residences

263 contributing to the waste stream at the time of sample collection. Again, no significant  
264 differences were observed (Fig. 5C;  $p = 0.17$  by Kruskal-Wallis test).

265 A similar analysis was conducted on the Ct values of the patient specimens based on the  
266 temporal proximity of positive wastewater samples (Fig. 5D). In this analysis, 21 of the  
267 identified student cases in sampled residences (21.5%) were not linked temporally with any  
268 positive wastewater sample. There was a significant difference in Ct values between categories,  
269 with significantly higher Ct values (lower viral RNA levels) found in patient samples that were  
270 not linked with any positive wastewater samples than in those found in patients in which a  
271 positive wastewater sample was detected in the seven days prior to specimen collection ( $p <$   
272  $0.001$  by Kruskal-Wallis test with Dunn's multiple comparisons).

273 Examining the ability of a positive wastewater test to predict the presence of a case in a  
274 residence, we found that 46 positive wastewater samples were collected from residences in  
275 which a student case was identified, in the period from 7 days prior to the positive patient  
276 sample(s) being collected to 14 days after the student(s) returned to the residence following  
277 isolation. In contrast, 12 positive wastewater samples were collected from residences in which  
278 no student case was identified (i.e. false positives), resulting in an overall positive predictive  
279 value of ~79% (Table 2; Chi square 48.1, Df = 1,  $p < 0.001$ ). Out of 350 negative wastewater  
280 samples, 120 were collected in the period from 7 days prior to a positive case identification to  
281 14 days after the student(s) returned to the residence (i.e. false negatives), resulting in an  
282 overall negative predictive value of ~66%. From this data, the sensitivity of the wastewater  
283 testing was ~28%, while the specificity was ~95%. The fact that many of the positive samples  
284 occurred in the 14 day period following students returning to a residence following isolation  
285 was not unexpected, as SARS-CoV-2 RNA can be detected in patient stool for several weeks  
286 following infection (23). However, this could confound the use of wastewater samples to  
287 identify new cases in a residence hall. To assess the predictive capacity for an isolated positive  
288 wastewater sample to identify new cases in residence halls with no recent cases, we excluded  
289 all samples collected in the 14 days following the return of a student to a residence from the  
290 analysis. We identified 14 positive wastewater samples collected in the period 7 days prior to  
291 when a positive patient sample was collected, in contrast to 10 negative samples collected in

292 the same period, giving a sensitivity of ~58% (Table 3; Chi square 64.61, Df = 1,  $p < 0.001$ ). The  
293 positive predictive value of these positive samples, based on the 12 false positive samples, was  
294 ~54%, while the negative predictive value was ~96%.

295 Overall, this data suggests that wastewater testing deployed in this manner can be  
296 largely predictive of SARS-CoV-2 infections in college residence halls; however, the analysis of a  
297 positive result can be complicated in situations where infected students return to a residence  
298 following isolation, as SARS-CoV-2 RNA may continue to be detected in the waste stream for at  
299 least two weeks after return.

300

### 301 **Discussion.**

302 Municipal wastewater testing for SARS-CoV-2 RNA can provide a robust indicator of  
303 community transmission (11, 13, 14), and this information can be used to inform public health  
304 responses. Many colleges and universities implemented wastewater surveillance testing during  
305 the 2020-2021 academic year (19); however, the efficacy of these efforts in identifying infection  
306 clusters and leading to mitigation of transmission has not been fully investigated. In this study,  
307 we combine data on wastewater SARS-CoV-2 detection from discrete campus residences with  
308 information on student cases, including RNA levels and timing of exit and return to the  
309 residence following isolation, to provide insight into the efficacy of wastewater surveillance as a  
310 public health strategy at a residential undergraduate college. Overall, we found that while  
311 around a quarter of positive wastewater samples indicated the presence of SARS-CoV-2-  
312 infected individuals prior to their identification by individual surveillance testing, half of the  
313 positive wastewater samples occurred within 14 days after students returned to residence halls  
314 following isolation. The capacity for individuals to continue to shed SARS-CoV-2 RNA in stool  
315 past the point of likely transmission potentially limits the utility of wastewater surveillance in a  
316 college environment where students leave and return to residences following infection.

317 Our results are generally concordant with other reports of wastewater surveillance  
318 programs on college campuses. Our determined positive predictive value for isolated  
319 wastewater positive samples (excluding dormitories with students returning from isolation), of  
320 ~54% is lower than some reported values, such as at the University of Arizona (82%; (21)), or at

321 UC San Diego, where wastewater surveillance allowed for the early diagnosis of 85% of cases on  
322 campus (16). However, these programs operated on a very different scale, with, for example,  
323 the UCSD system employing 68 samplers with automated sample processing of daily samples.  
324 Similar to other institutions, we could identify single cases in a residence hall from wastewater  
325 samples (17, 18), although a large number of negative samples from residences with student  
326 cases decreased the overall sensitivity. Groups that sampled on a weekly basis concluded that  
327 that was too infrequent for effective identification of cases, and suggested that daily testing  
328 would be most appropriate (20). We found that our strategy, where most residences were  
329 sampled 2-3 times a week, was generally effective while not becoming impractical to manage  
330 for a small academic laboratory.

331 We observed significantly higher average Ct values (lower viral RNA levels) among cases  
332 in the fall semester than the spring semester (Fig. 3A). This is most likely a reflection of changes  
333 in the stringency of the cutoff for the identification of a positive case used by the PCR testing  
334 provider that occurred around October 2020. Initially, a positive case was identified by a  
335 defined Ct value of <40 in one of two PCR reactions using different primer pairs. Starting in  
336 October, a third PCR reaction was added to the protocol, with a positive case identified with a  
337 defined Ct value of <40 in at least two of the three reactions. This increased stringency may  
338 have helped exclude potential false positives, especially when the positive predictive value of  
339 the PCR-based test was low due to low prevalence in the population. These data could also  
340 potentially be explained by students having been infected during the summer and continuing to  
341 shed low levels of SARS-CoV-2 RNA in their nasopharynx at the time of the arrival tests in  
342 August. If this were the case, however, we would have expected the pre-arrival test that  
343 students took ahead of coming to campus to identify these individuals. Alternatively, students  
344 may have been infected during travel to campus, and therefore have been tested at a time  
345 prior to when they reached peak RNA levels. However, if this were the case, we would have  
346 expected that positive cases identified in the second round of arrival testing would have lower  
347 Ct values (higher RNA levels), which was not observed. Whatever the reason for this difference,  
348 it has implications for our wastewater results, as cases with higher Ct values (lower RNA levels)  
349 were significantly less likely to be associated with a positive wastewater result (Fig. 5D).

350 We observed no significant difference in the normalized SARS-CoV-2 RNA levels in  
351 wastewater based on the proximity of the wastewater sample to when a positive student case  
352 was identified (Fig. 5B), or based on the number of cases contributing to the waste stream (Fig.  
353 5C). These results are contrary to other reports, in which wastewater SARS-CoV-2 RNA levels  
354 were observed to tightly correlate with case numbers (13, 14). We attribute this discrepancy to  
355 the relatively small number of people contributing to each waste stream in our study (hundreds  
356 vs. several thousand individuals in some municipal sewer sheds), and to the variable and  
357 sporadic nature of the flow rate at each sampling location. Composite samples from the lift  
358 stations tended to be more consistent than from the sewer access holes, where the flow rate  
359 changed dramatically on a minute-by-minute basis, and where the structure of the sewer  
360 caused pooling in some lines more than others. This caused marked differences in the amount  
361 and density of samples collected, and this variability could potentially lead to differences in the  
362 amount of biological material collected between the locations, or between samples from the  
363 same location. Additionally, during periods of inclement weather, some sampling locations  
364 could only be sampled with a single draw, rather than a 24-hour composite. These factors could  
365 therefore impact the relative concentration of SARS-CoV-2 RNA present in each sample, despite  
366 the use of RNase P RNA levels to normalize the SARS-CoV-2 RNA levels. Furthermore, the  
367 variable flow rate, as well as the lack of equipment to accurately measure this type of flow,  
368 made absolute quantification of SARS-CoV-2 genome copies per milliliter, (the standard used by  
369 several other studies; (11, 13)), impossible. We conclude that under these conditions, detection  
370 of SARS-CoV-2 RNA in the waste stream should be considered on a positive/negative basis,  
371 rather than attempting to use RNA quantification as a predictor of case load or timing.

372 One limitation of the study is that, due to the layout of campus infrastructure, several of  
373 the sample collection points did not only capture waste from student residences. In some cases,  
374 other campus buildings contributed to the waste stream (though every effort was made to  
375 minimize this), whereas in other cases, the residence halls also house additional administrative  
376 or classroom spaces. Additionally, custodial and facilities maintenance staff routinely accessed  
377 the buildings and may have contributed to the waste stream at the sampling locations. In one  
378 instance in the fall semester, a positive SARS-CoV-2 RNA signal in a wastewater sample was

379 used to guide targeted PCR-based testing of students in residences, which did not identify any  
380 positive student cases. Concurrently, however, an employee that spent time in the space(s)  
381 contributing to that waste stream did test positive for SARS-CoV-2 infection, although whether  
382 they used restroom facilities in those location(s) is not known. Therefore, it is possible that  
383 other positive wastewater samples that did not coincide with a positive case may not be “false  
384 positives,” per se, but rather reflect other non-residents that contributed to the waste stream.  
385 It is also possible that these positive wastewater samples reflect infected students that were  
386 not identified by individual surveillance testing, either because they were not tested during  
387 their infection or their test results were falsely negative.

388         There are several additional limitations of this study that impact our ability to fully  
389 interpret the data. First, students that reported symptoms consistent with COVID-19 were  
390 tested using an in-house rapid nucleic acid amplification system that does not provide Ct  
391 values. Differences in viral dynamics at the time of testing (in surveillance tests vs. symptomatic  
392 testing) could skew our analysis of the Ct values of cases associated with positive wastewater  
393 detection of SARS-CoV-2. Second, the nature of our sampling strategy, with the collectors  
394 rotating between sampling locations on a two-to-three-day schedule, means that our samples  
395 were not evenly spaced, especially around times of arrival testing, when a majority of our  
396 positive cases were detected, and around times when students returned to residence halls  
397 following isolation. This confounds our analysis of wastewater RNA levels relative to the time of  
398 case detection or return, as it meant that some residences may have been sampled the  
399 morning after a student returned (potentially leading to a higher level of viral RNA shed into the  
400 waste stream), whereas others might not have been sampled until up to 72 h post-return, when  
401 shed RNA levels may have been lower. A sampling protocol that allowed for more continuous  
402 monitoring of wastewater RNA levels from residences following a return from isolation may  
403 have allowed for a more precise correlation between RNA levels and time from isolation return  
404 to be detected. This, however, would require more resources devoted to the project and would  
405 be beyond the scope of what our laboratory could handle. Finally, due to infrastructure  
406 architecture and geography, only around 73% of students lived in residences that could be

407 easily monitored via the waste stream. This decreased the overall utility of wastewater  
408 surveillance as a means for managing emerging cases on campus.

409 Overall, based on the data presented here and our lived experience of managing the  
410 COVID-19 pandemic during the 2020-2021 academic year at Colgate University, we found that  
411 on a practical level, wastewater surveillance had more utility in the fall semester, when a  
412 smaller percentage of the community was subject to random PCR-based individual surveillance  
413 testing. The wastewater results could then be used to direct additional targeted testing to  
414 individual residences with positive wastewater RNA samples, and, with a positive predictive  
415 value of ~54% for an isolated wastewater positive sample, this could be potentially be a more  
416 cost- and resource-effective means of detecting new positive cases than large-scale individual  
417 student testing. In the spring semester, with approximately half of the students in each  
418 residence were tested each week, by the time a positive wastewater sample was detected, it  
419 was more practical to wait for the individual surveillance results to become available than to  
420 target students in those residences for additional testing. This was further confounded when  
421 positive student cases returned to the residences following isolation, making it difficult to  
422 distinguish between a new infection and continued SARS-CoV-2 RNA shedding in previously-  
423 infected individuals. Additionally, the presence of cases in residences in which no wastewater  
424 SARS-CoV-2 RNA was detected suggests that wastewater surveillance of this type should not be  
425 used as the only means for the detection of cases on campus. As the price of personal  
426 surveillance testing, via pooled or individual samples, continues to decrease, we conclude that  
427 this should be viewed as a more effective means of controlling SARS-CoV-2 transmission on  
428 campus than wastewater testing of individual residence halls.

429  
430 **Authorship contribution statement:** **G.H.H.** initiated the project, developed the wastewater  
431 sampling strategy and SARS-CoV-2 RNA detection protocol, contributed to sample collection,  
432 analyzed and interpreted the data, and drafted the manuscript; **M.L.** contributed to sample  
433 collection, performed the RNA extraction and qPCR, analyzed the qPCR data, and edited the  
434 manuscript; **E.B.** contributed to sample collection; **E.L.** and **M.M** collected and assembled  
435 deidentified patient information, and edited the manuscript.

436

437 **Declaration of competing interest:**

438

439 The authors declare that they have no known competing financial interests or personal  
440 relationships that could have appeared to influence the work reported in this manuscript.

441

442 **Data availability statement:** All data related to this project is available at figshare.com, licensed  
443 CC by 4.0

444

445 **Acknowledgments:** The authors wish to thank David Larsen (Syracuse University) and Hyatt  
446 Green (SUNY ESF) for their initial input and advice on implementing a wastewater surveillance  
447 system. We also wish to thank Dan Gough, former Colgate University Associate Vice President  
448 for Campus Safety, and Environmental Health, and Emergency Management for assistance in  
449 initiating the project, and in procuring the wastewater sample collection devices. The authors  
450 are also grateful to Jim Albertina and the Colgate University Plumbing Department for their  
451 assistance in identifying, establishing, and maintaining wastewater sampling locations. We  
452 thank Karen Cheal, Neal Albert, and the office of Institutional Planning and Research for  
453 providing student housing data. We also thank Bineyam Taye and David Larsen for their  
454 thoughtful review of the manuscript. The authors are extremely grateful to the employees in  
455 Student Health Services, as well as the student and other volunteers who worked tirelessly in  
456 collecting student and employee patient samples throughout the year. Finally, the authors are  
457 extremely grateful to the Colgate University Health Analytics Team, especially Sev Flanigen, Tim  
458 Borfitz, and Mary Williams, for their work on behalf of the university, and for their thoughtful  
459 and productive analysis on the use of wastewater surveillance data to manage Colgate's COVID-  
460 19 pandemic response. This project was funded entirely by Colgate University.

461

462 **References.**

463 1. **Xiao F, Tang M, Zheng X, Liu Y, Li X, Shan H.** 2020. Evidence for Gastrointestinal Infection  
464 of SARS-CoV-2. *Gastroenterology*2020/03/03. **158**:1831-1833.e3.



- 465 2. **Lee S, Yoon GY, Myoung J, Kim S-J, Ahn D-G.** 2020. Robust and persistent SARS-CoV-2  
466 infection in the human intestinal brush border expressing cells. *Emerg Microbes Infect*  
467 **9**:2169–2179.
- 468 3. **Chen Y, Chen L, Deng Q, Zhang G, Wu K, Ni L, Yang Y, Liu B, Wang W, Wei C, Yang J, Ye**  
469 **G, Cheng Z.** 2020. The presence of SARS-CoV-2 RNA in the feces of COVID-19 patients. *J*  
470 *Med Virol* **92**:833–840.
- 471 4. **Zhang Y, Chen C, Song Y, Zhu S, Wang D, Zhang H, Han G, Weng Y, Xu J, Xu J, Yu P, Jiang**  
472 **W, Yang X, Lang Z, Yan D, Wang Y, Song J, Gao GF, Wu G, Xu W.** 2020. Excretion of SARS-  
473 CoV-2 through faecal specimens. *Emerg Microbes Infect* **9**:2501–2508.
- 474 5. **Tang A, Tong Z-D, Wang H-L, Dai Y-X, Li K-F, Liu J-N, Wu W-J, Yuan C, Yu M-L, Li P, Yan J-**  
475 **B.** 2020. Detection of Novel Coronavirus by RT-PCR in Stool Specimen from  
476 Asymptomatic Child, China. *Emerg Infect Dis*2020/06/17. **26**:1337–1339.
- 477 6. **Santiso-Bellón C, Randazzo W, Pérez-Cataluña A, Vila-Vicent S, Gozalbo-Rovira R,**  
478 **Muñoz C, Buesa J, Sanchez G, Rodríguez Díaz J.** 2020. Epidemiological Surveillance of  
479 Norovirus and Rotavirus in Sewage (2016-2017) in Valencia (Spain). *Microorganisms*  
480 **8**:458.
- 481 7. **Lodder WJ, Buisman AM, Rutjes SA, Heijne JC, Teunis PF, de Roda Husman AM.** 2012.  
482 Feasibility of quantitative environmental surveillance in poliovirus eradication strategies.  
483 *Appl Environ Microbiol*2012/03/23. **78**:3800–3805.
- 484 8. **Zurbriggen S, Tobler K, Abril C, Diedrich S, Ackermann M, Pallansch MA, Metzler A.**  
485 2008. Isolation of sabin-like polioviruses from wastewater in a country using inactivated  
486 polio vaccine. *Appl Environ Microbiol*2008/07/18. **74**:5608–5614.
- 487 9. **Sims N, Kasprzyk-Hordern B.** 2020. Future perspectives of wastewater-based  
488 epidemiology: Monitoring infectious disease spread and resistance to the community  
489 level. *Environ Int*2020/04/04. **139**:105689.
- 490 10. **Nemudryi A, Nemudraia A, Wiegand T, Surya K, Buyukyoruk M, Cicha C, Vanderwood**  
491 **KK, Wilkinson R, Wiedenheft B.** 2020. Temporal Detection and Phylogenetic Assessment  
492 of SARS-CoV-2 in Municipal Wastewater. *Cell Reports Med* **1**:100098.
- 493 11. **Wu F, Zhang J, Xiao A, Gu X, Lee WL, Armas F, Kauffman K, Hanage W, Matus M, Ghaeli**

- 494 **N, Endo N, Duvallet C, Poyet M, Moniz K, Washburne AD, Erickson TB, Chai PR,**  
495 **Thompson J, Alm EJ.** 2020. SARS-CoV-2 Titers in Wastewater Are Higher than Expected  
496 from Clinically Confirmed Cases. *mSystems* **5**:e00614-20.
- 497 12. **Weidhaas J, Aanderud ZT, Roper DK, VanDerslice J, Gaddis EB, Ostermiller J, Hoffman K,**  
498 **Jamal R, Heck P, Zhang Y, Torgersen K, Laan J Vander, LaCross N.** 2021. Correlation of  
499 SARS-CoV-2 RNA in wastewater with COVID-19 disease burden in sewersheds. *Sci Total*  
500 *Environ*2021/02/12. **775**:145790.
- 501 13. **Peccia J, Zulli A, Brackney DE, Grubaugh ND, Kaplan EH, Casanovas-Massana A, Ko AI,**  
502 **Malik AA, Wang D, Wang M, Warren JL, Weinberger DM, Arnold W, Omer SB.** 2020.  
503 Measurement of SARS-CoV-2 RNA in wastewater tracks community infection dynamics.  
504 *Nat Biotechnol* **38**:1164–1167.
- 505 14. **Randazzo W, Truchado P, Cuevas-Ferrando E, Simón P, Allende A, Sánchez G.** 2020.  
506 SARS-CoV-2 RNA in wastewater anticipated COVID-19 occurrence in a low prevalence  
507 area. *Water Res* **181**:115942.
- 508 15. **Medema G, Heijnen L, Elsinga G, Italiaander R, Brouwer A.** 2020. Presence of SARS-  
509 Coronavirus-2 RNA in Sewage and Correlation with Reported COVID-19 Prevalence in the  
510 Early Stage of the Epidemic in The Netherlands. *Environ Sci Technol Lett*  
511 *acs.estlett*.0c00357.
- 512 16. **Karthikeyan S, Nguyen A, McDonald D, Zong Y, Ronquillo N, Ren J, Zou J, Farmer S,**  
513 **Humphrey G, Henderson D, Javidi T, Messer K, Anderson C, Schooley R, Martin NK,**  
514 **Knight R, McGrath J.** 2021. Rapid, Large-Scale Wastewater Surveillance and Automated  
515 Reporting System Enable Early Detection of Nearly 85% of COVID-19 Cases on a  
516 University Campus. *mSystems* **0**:e00793-21.
- 517 17. **Scott LC, Aubee A, Babahaji L, Vigil K, Tims S, Aw TG.** 2021. Targeted wastewater  
518 surveillance of SARS-CoV-2 on a university campus for COVID-19 outbreak detection and  
519 mitigation. *Environ Res* **200**:111374.
- 520 18. **Gibas C, Lambirth K, Mittal N, Juel MAI, Barua VB, Roppolo Brazell L, Hinton K, Lontai J,**  
521 **Stark N, Young I, Quach C, Russ M, Kauer J, Nicolosi B, Chen D, Akella S, Tang W,**  
522 **Schlueter J, Munir M.** 2021. Implementing building-level SARS-CoV-2 wastewater

- 523 surveillance on a university campus. *Sci Total Environ*2021/03/30. **782**:146749.
- 524 19. **Harris-Lovett S, Nelson KL, Beamer P, Bischel HN, Bivins A, Bruder A, Butler C,**  
525 **Camenisch TD, De Long SK, Karthikeyan S, Larsen DA, Meierdiercks K, Mouser PJ,**  
526 **Pagsuyoin S, Prasek SM, Radniecki TS, Ram JL, Roper DK, Safford H, Sherchan SP,**  
527 **Shuster W, Stalder T, Wheeler RT, Korfmacher KS.** 2021. Wastewater Surveillance for  
528 SARS-CoV-2 on College Campuses: Initial Efforts, Lessons Learned, and Research Needs.  
529 *Int J Environ Res Public Heal* .
- 530 20. **Sharkey ME, Kumar N, Mantero AMA, Babler KM, Boone MM, Cardentey Y, Cortizas**  
531 **EM, Grills GS, Herrin J, Kemper JM, Kenney R, Kobetz E, Laine J, Lamar WE, Mader CC,**  
532 **Mason CE, Quintero AZ, Reding BD, Roca MA, Ryon K, Solle NS, Schürer SC, Shukla B,**  
533 **Stevenson M, Stone T, Tallon JJ, Venkatapuram SS, Vidovic D, Williams SL, Young B,**  
534 **Solo-Gabriele HM.** 2021. Lessons learned from SARS-CoV-2 measurements in  
535 wastewater. *Sci Total Environ* **798**:149177.
- 536 21. **Betancourt WQ, Schmitz BW, Innes GK, Prasek SM, Pogreba Brown KM, Stark ER, Foster**  
537 **AR, Sprissler RS, Harris DT, Sherchan SP, Gerba CP, Pepper IL.** 2021. COVID-19  
538 containment on a college campus via wastewater-based epidemiology, targeted clinical  
539 testing and an intervention. *Sci Total Environ*2021/03/13. **779**:146408.
- 540 22. **Wilder ML, Middleton F, Larsen DA, Du Q, Fenty A, Zeng T, Insaf T, Kilaru P, Collins M,**  
541 **Kmush B, Green HC.** 2021. Co-quantification of crAssphage increases confidence in  
542 wastewater-based epidemiology for SARS-CoV-2 in low prevalence areas. *Water Res*  
543 *X*2021/04/06. **11**:100100.
- 544 23. **Jones DL, Baluja MQ, Graham DW, Corbishley A, McDonald JE, Malham SK, Hillary LS,**  
545 **Connor TR, Gaze WH, Moura IB, Wilcox MH, Farkas K.** 2020. Shedding of SARS-CoV-2 in  
546 feces and urine and its potential role in person-to-person transmission and the  
547 environment-based spread of COVID-19. *Sci Total Environ*2020/07/31. **749**:141364.

548

#### 549 **Figure Legends.**

550

551 **Figure 1.** Location of wastewater sample collection points on the Colgate University campus.

552 Locations 1-5 were at sewer access holes, while locations 6-7 were at wastewater lift stations.

553 Colored lines indicate approximate location of sewage drains from each residence.

554

555 **Figure 2.** Aggregate wastewater and patient case data at Colgate University, August 2020-May 2021.

556 Normalized SARS-CoV-2 RNA levels in wastewater (black symbols; left Y-axis) and number of positive

557 student cases (gray bars; right Y-axis) are shown from the fall semester 2020 (A) and spring semester

558 2021 (B). Symbol shapes represent individual sampling locations and associated residence halls, as

559 indicated in the legend.

560

561 **Figure 3.** The relative level of SARS-CoV-2 RNA in positive SARS-CoV-2 clinical cases, but not the

562 levels of wastewater RNA, were significantly higher in the spring semester. The data points

563 represent the average Ct value from positive cases (A) and the normalized level of SARS-CoV-2 RNA

564 levels in positive wastewater samples (B). \*\*\*\*,  $p < 0.0001$  by Welch's t test. ns,  $p > 0.05$  of log

565 transformed data by Welch's t test.

566

567 **Figure 4. Aggregate wastewater and patient case data for sampled sewersheds, Colgate**

568 **University, August 2020 - May 2021.** Normalized SARS-CoV-2 RNA levels in wastewater (black

569 circles; left Y-axis) and average Ct values of positive cases (red circles; right Y-axis) are shown from

570 each wastewater sampling location. Red stars indicate positive student tests for which no Ct value

571 was available. Yellow and green squares represent the time of isolation start (when individual

572 student cases were removed from the indicated residences) and the time of return to the residence

573 following isolation, respectively.

574

575 **Figure 5. Temporal association of SARS-CoV-2 levels in wastewater RNA and Ct values of positive**

576 **cases.** Data from individual wastewater SARS-CoV-2 RNA samples and positive SARS-CoV-2 cases

577 were classified according to the indicated temporal relationships. A. The number of positive

578 wastewater samples according to temporal category, with respect to positive case in the residences

579 contributing to the waste stream. B. The relative wastewater SARS-CoV-2 level according to

580 temporal category, with respect to positive case(s) in residences contributing to the waste stream. C.

581 The relative wastewater SARS-CoV-2 level according to the number of clinical cases identified in  
582 residences contributing to the waste stream at the time of collection. D. The relative Ct value of  
583 positive case(s) according to temporal category, with respect to positive detection(s) of SARS-CoV-2  
584 in the waste stream. Data represent total number of samples (a) or a box and whisker plot indicating  
585 the 5th and 95th percentile (B,C). \*\*\*,  $p < 0.001$  by Kruskal-Wallis test, with Dunn's multiple  
586 comparison.

It is made available under a [CC-BY-NC-ND 4.0 International license](https://creativecommons.org/licenses/by-nc-nd/4.0/).

**Table 1.** Student population, cases, and positive wastewater samples at Colgate University, Fall 2020-Spring 2021.

| Sampling Locations                                                             | Fall Population     | Spring Population   | Fall Cases        | Spring Cases      | Fall Positive WW samples | Spring Positive WW samples |
|--------------------------------------------------------------------------------|---------------------|---------------------|-------------------|-------------------|--------------------------|----------------------------|
| GH/BAE                                                                         | 336                 | 336                 | 4                 | 7                 | 4                        | 7                          |
| SWP                                                                            | 289                 | 269                 | 3                 | 5                 | 3                        | 5                          |
| CD                                                                             | 338                 | 330                 | 6                 | 13                | 0                        | 13                         |
| BC                                                                             | 370                 | 365                 | 5                 | 6                 | 2                        | 2                          |
| PL                                                                             | 162                 | 160                 | 7                 | 5                 | 2                        | 12                         |
| TH                                                                             | 219                 | 212                 | 6                 | 12                | 1                        | 9                          |
| <b>Total Student Population/Cases in Sampled Residences (percent of total)</b> | <b>1714 (73.5%)</b> | <b>1672 (73.3%)</b> | <b>31 (70.5%)</b> | <b>48 (76.2%)</b> |                          |                            |
| <b>Total Student Population/Cases in Non-Sampled Campus Residences</b>         | <b>619 (26.5%)</b>  | <b>608 (26.7%)</b>  | <b>13 (29.5%)</b> | <b>15 (23.8%)</b> |                          |                            |
| <b>Total</b>                                                                   | <b>2333</b>         | <b>2280</b>         | <b>44</b>         | <b>63</b>         |                          |                            |

**Table 2.** Performance of SARS-CoV-2 wastewater testing (within <7 days pre-case identification to 14 days post return from isolation) in predicting human cases at Colgate University, Fall 2020-Spring 2021

|                                                                                                                 | Student case(s) in the sampled residence | No student case(s) in the sampled residence |                    |
|-----------------------------------------------------------------------------------------------------------------|------------------------------------------|---------------------------------------------|--------------------|
| Positive wastewater sample (from within <7 days pre-case identification to <14 days post-return from isolation) | 46                                       | 12                                          | <b>PPV: 79.31%</b> |
| Negative wastewater sample (from within <7 days pre-case identification to <14 days post-return from isolation) | 120                                      | 230                                         | <b>NPV: 65.71%</b> |
|                                                                                                                 | <b>Sensitivity: 27.71%</b>               |                                             |                    |
| <b>Chi-square value 48.1, Df = 1, p &lt; 0.001</b>                                                              | <b>Specificity: 95.04%</b>               |                                             |                    |

**Table 3.** Performance of SARS-CoV-2 wastewater testing (within <7 days pre-case identification) in predicting human cases at Colgate University, Fall 2020-Spring 2021

|                                                                          | Student case(s) in the sampled residence | No student case(s) in the sampled residence |                    |
|--------------------------------------------------------------------------|------------------------------------------|---------------------------------------------|--------------------|
| Positive wastewater sample (from within <7 days pre-case identification) | 14                                       | 12                                          | <b>PPV: 53.85%</b> |
| Negative wastewater sample (from within <7 days pre-case identification) | 10                                       | 230                                         | <b>NPV: 95.83%</b> |
|                                                                          | <b>Sensitivity: 58.33%</b>               |                                             |                    |
| <b>Chi-square value 64.61, Df = 1, p &lt; 0.001</b>                      | <b>Specificity: 95.04%</b>               |                                             |                    |

1. Gate House (GH)
2. Burke/Andrews/East (BAE)
3. Stillman/West/Pinchin (SWP)
4. Curtis/Drake (CD)
5. Bryan/113 Broad (BC)
6. Parker Lift Station (PL)
7. Townhouses (TH)

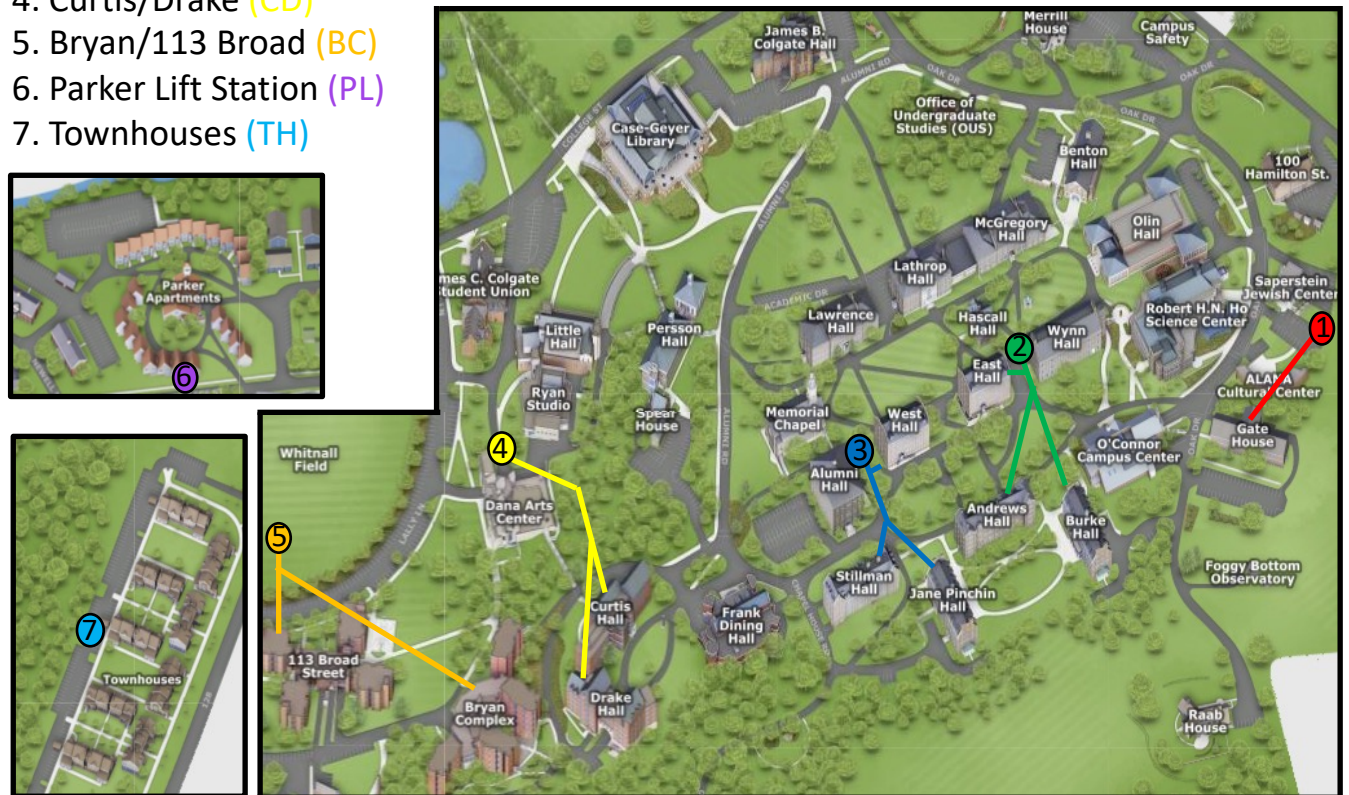

**Figure 1.** Location of wastewater sample collection points on the Colgate University campus. Locations 1-5 were at sewer access holes, while locations 6-7 were at wastewater lift stations. Colored lines indicate approximate location of sewage drains from each residence.

It is made available under a [CC-BY-NC-ND 4.0 International license](https://creativecommons.org/licenses/by-nc-nd/4.0/).

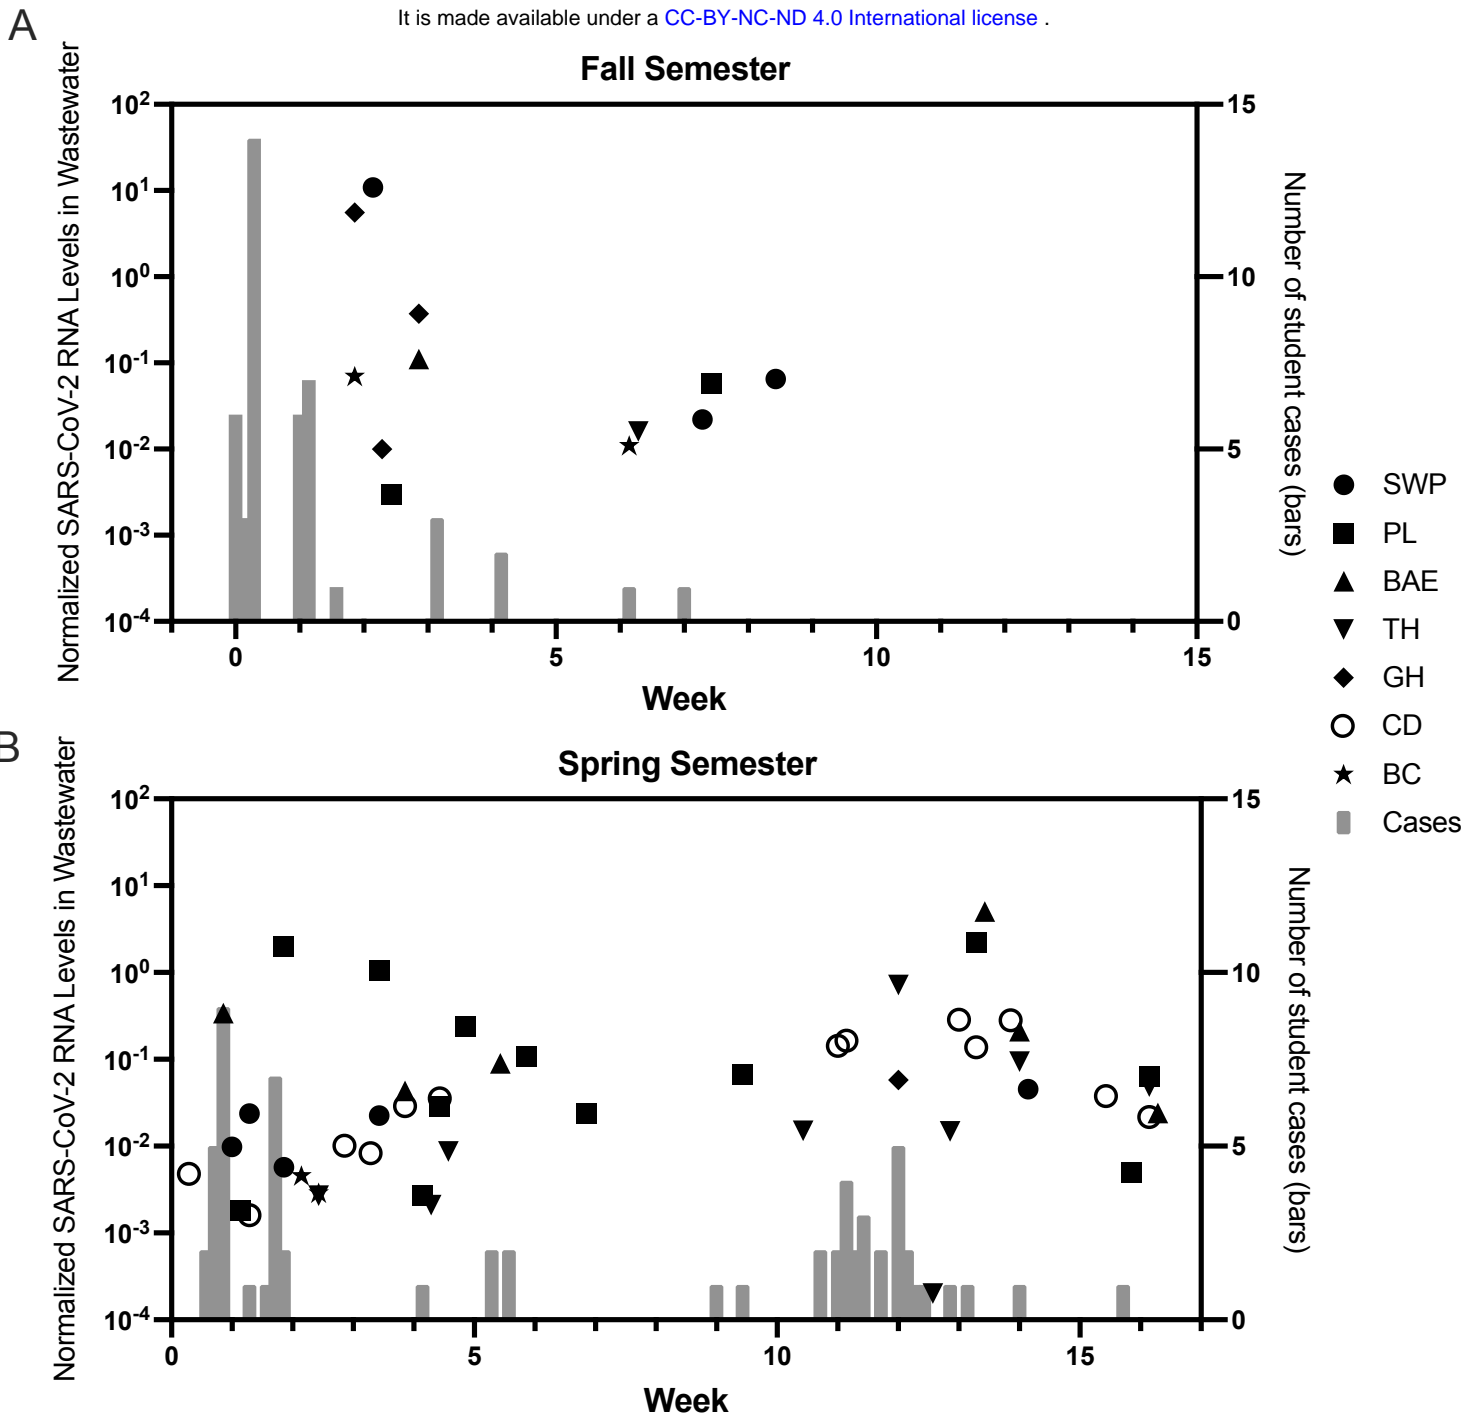

**Figure 2.** Aggregate wastewater and patient case data at Colgate University, August 2020-May 2021. Normalized SARS-CoV-2 RNA levels in wastewater (black symbols; left Y-axis) and number of positive student cases (gray bars; right Y-axis) are shown from the fall semester 2020 (A) and spring semester 2021 (B). Symbol shapes represent individual sampling locations and associated residence halls, as indicated in the legend.



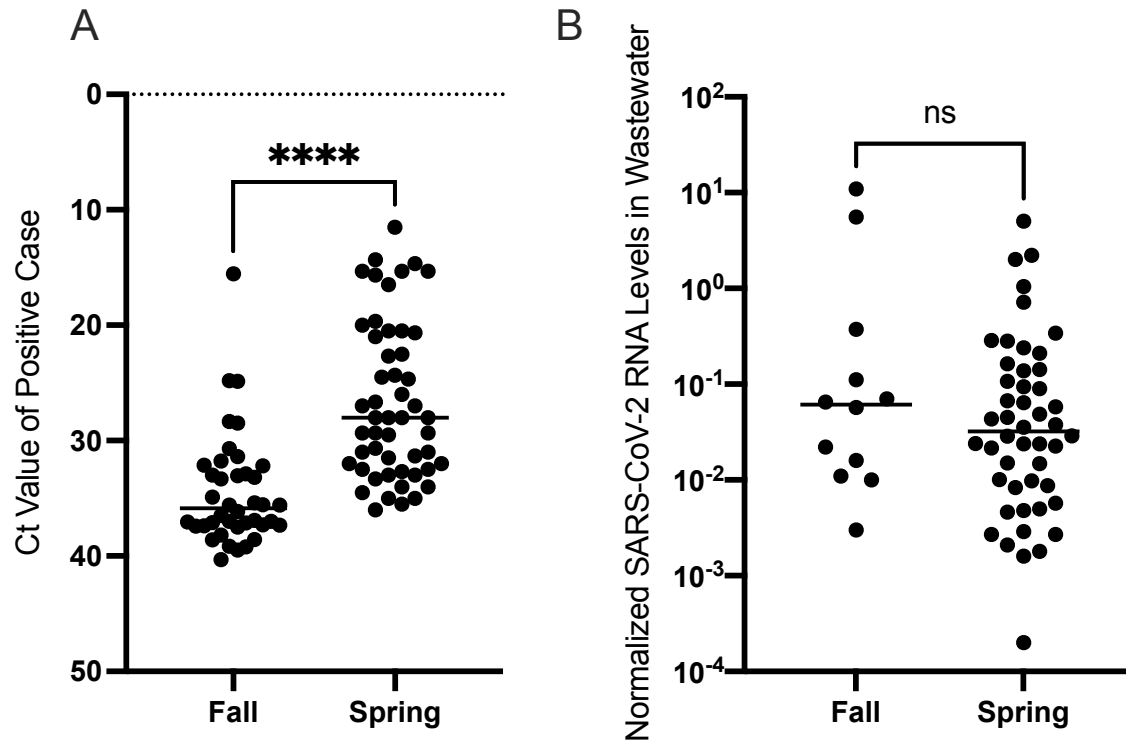

**Figure 3.** The relative level of SARS-CoV-2 RNA in positive SARS-CoV-2 clinical cases, but not the levels of wastewater RNA, were significantly higher in the spring semester. The data points represent the average Ct value from positive cases (A) and the normalized level of SARS-CoV-2 RNA levels in positive wastewater samples (B). \*\*\*\*,  $p < 0.0001$  by Welch's t test. ns,  $p > 0.05$  of log transformed data by Welch's t test.

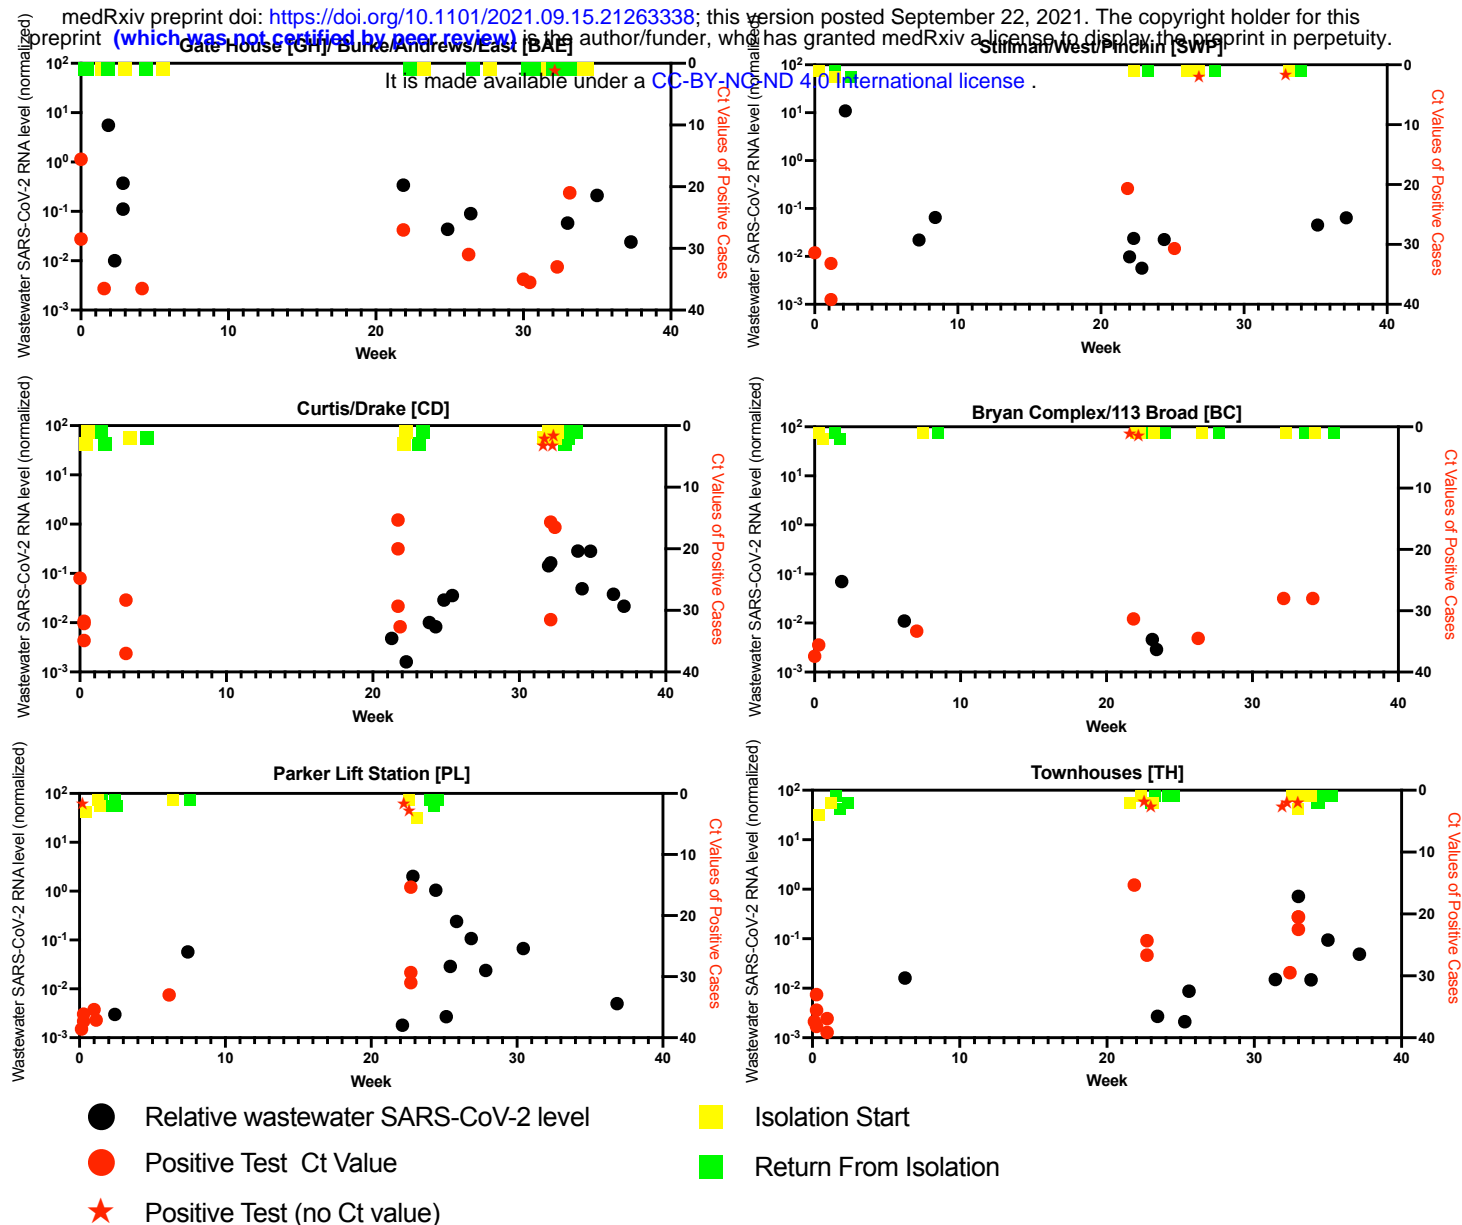

**Figure 4. Aggregate wastewater and patient case data for sampled sewersheds, Colgate University, August 2020 - May 2021.** Normalized SARS-CoV-2 RNA levels in wastewater (black circles; left Y-axis) and average Ct values of positive cases (red circles; right Y-axis) are shown from each wastewater sampling location. Red stars indicate positive student tests for which no Ct value was available. Yellow and green squares represent the time of isolation start (when individual student cases were removed from the indicated residences) and the time of return to the residence following isolation, respectively.

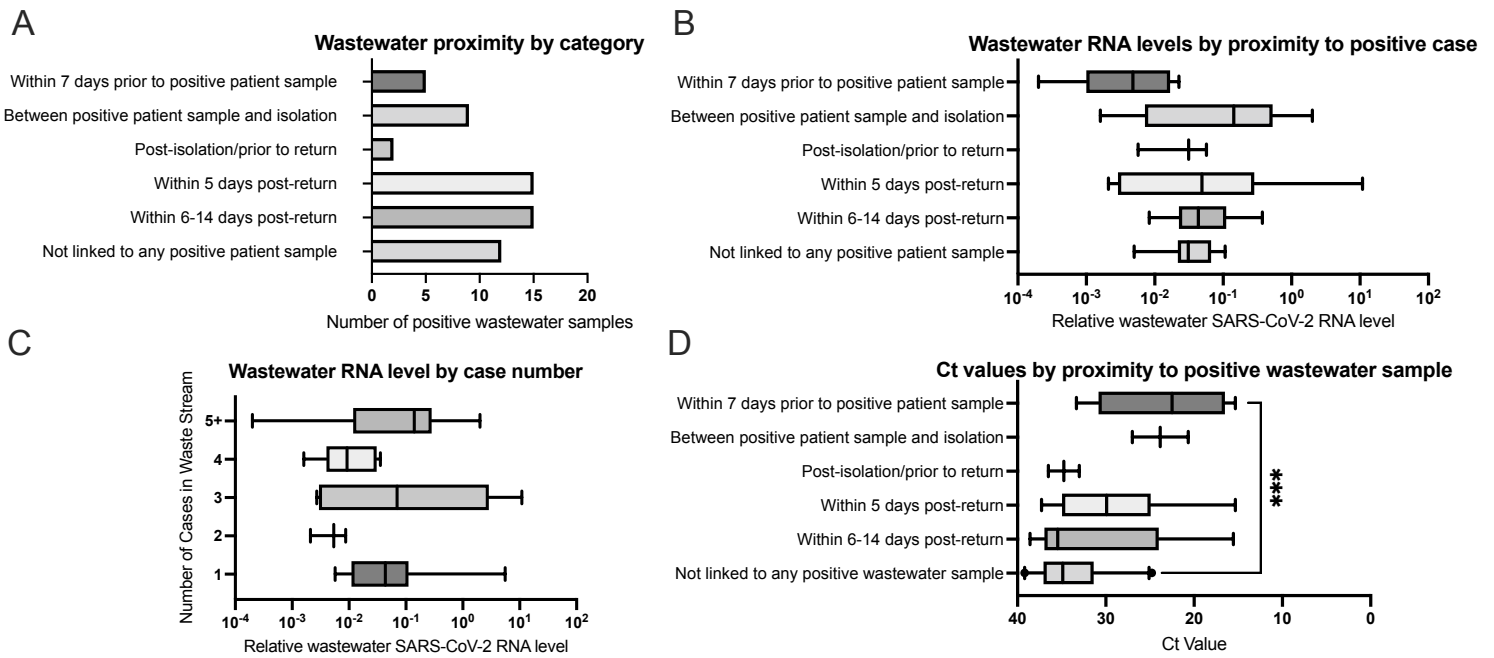

**Figure 5. Temporal association of SARS-CoV-2 levels in wastewater RNA and Ct values of positive cases.** Data from individual wastewater SARS-CoV-2 RNA samples and positive SARS-CoV-2 cases were classified according to the indicated temporal relationships. A. The number of positive wastewater samples according to temporal category, with respect to positive case in the residences contributing to the waste stream. B. The relative wastewater SARS-CoV-2 level according to temporal category, with respect to positive case(s) in residences contributing to the waste stream. C. The relative wastewater SARS-CoV-2 level according to the number of clinical cases identified in residences contributing to the waste stream at the time of collection. D. The relative Ct value of positive case(s) according to temporal category, with respect to positive detection(s) of SARS-CoV-2 in the waste stream. Data represent total number of samples (a) or a box and whisker plot indicating the 5th and 95th percentile (B,C). **\*\*\***,  $p < 0.001$  by Kruskal-Wallis test, with Dunn's multiple comparison.
